# Supplementary material
Source: PubMed Central journal article supplement (PMC3141891)
Supplement: supp_mol.111.072157_Supplementary_Figure_2.pdf [file supp_mol.111.072157_Supplementary_Figure_2.pdf]

# Thyrotropin Receptor Stimulates Internalization-independent Persistent Phosphoinositide

## Signaling

Alisa Boutin, Michael D. Allen, Elizabeth Geras-Raaka, Wenwei Huang, Susanne Neumann and

Marvin C. Gershengorn

## Molecular Pharmacology

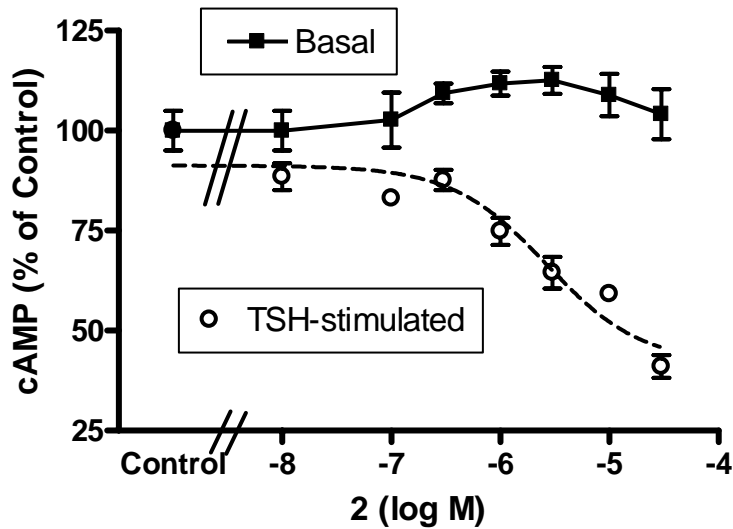

Supplementary Figure 2. **2** is a neutral antagonist of TSHR.

HEKTSHR cells were exposed to the noted concentrations of **2** in the absence of TSH but 20 min prior to 1 mM IBMX (Basal) or 20 min prior to the addition of a half-maximally effective concentration of TSH (1.8 nM) and 1 mM IBMX (TSH-stimulated). After an additional 40 min incubation in the presence of IBMX alone (Basal) or IBMX and TSH (TSH-stimulated), the cells were lysed and cAMP levels were measured by ELISA. **2** did not inhibit basal cAMP production but inhibited TSH-stimulated cAMP production with an  $IC_{50}$  of 2.7  $\mu$ M.
